# Supplementary material for: Finding gene network topologies for given biological function with recurrent neural network
Source: PubMed Central journal article supplement (PMC8149884; doi:10.1038/s41467-021-23420-5), 2021-05-25
Supplement: 41467_2021_23420_MOESM1_ESM.pdf [file 41467_2021_23420_MOESM1_ESM.pdf]

1 Supplemental Information for  
2 **Finding Gene Network Topologies for Given Biological Function with Recurrent**  
3 **Neural Network**

4 Jingxiang Shen, Feng Liu, Yuhai Tu and Chao Tang

5 Correspondence to: tangc@pku.edu.cn

6

7 **This PDF file includes:**

8 Supplemental text S1 to S11

9 Figures S1 to S6

10 Table S1 to S5

11 Supplemental references

12

13 **(S1) Derivative and the link-mutation method in revealing the learnt regulations**

14 With the regulatory link from node  $i$  to  $j$  being knocked down by a factor  $\lambda$ , the NN  
15 output (synthesis term  $f$ ) changes accordingly. If this perturbed  $f$  function is integrated  
16 through time following equation 3, the resulting trajectory is called the “mutant  
17 trajectory”  $\mathbf{g}^{(i,j)}$ . And its difference with the unperturbed trajectory  $\mathbf{g}^{WT}$  gives the  
18 “mutant trajectory measure” of the effective gene regulation.

$$19 \quad W_{i \text{ to } j} \equiv - \int_t \left( g_j^{(i,j)}(t) - g_j^{WT}(t) \right) dt \quad (S1)$$

20  
21 Another representation of the effective regulation is introduced in the main text as  
22  $\langle \Delta_{ij} \rangle_{WT}$ , where  $\Delta_{ij}(\mathbf{g}, \lambda)$  is defined by equation 2. To be specific,

$$23 \quad \langle \Delta_{ij} \rangle_{WT} = \sum_{\{I(t)\}} \int_t f_j \left( I(t), \dots, g_i^{WT}(t) \right) - f_j \left( I(t), \dots, \lambda g_i^{WT}(t) \right) dt \quad (S2)$$

24 where  $f$  here is the trained NN time evolution function, and  $\mathbf{g}^{WT}(t)$  is the WT  
25 (unperturbed) response curve under stimuli  $I(t)$ . Note that this quantity is also averaged  
26 across several different strengths of the input signal (for the controlled oscillation task).  
27 For the final CA example, as there is no external input, we average  $\Delta_{ij}$  over different  
28 random initial conditions.

29  
30 A third way of defining a measure of the effective regulations of a learnt black box is  
31 to evaluate  $\Delta_{ij}$  with respect to randomly sampled  $\mathbf{g}$  values instead of the WT  
32 trajectory. This  $\langle \Delta_{ij} \rangle_{random \ samples}$  is a much rougher estimation than  $\langle \Delta_{ij} \rangle_{WT}$ , since  
33 it ignores the fact that the NN function  $f$  is trained only around the WT trajectories.

34  
35 Besides, the partial derivative  $\partial f_j / \partial g_i$  also reflects the regulation effect of node  $i$  on  
36 node  $j$ . As discussed above,  $\partial f_j / \partial g_i$  can also be evaluated with respect to randomly  
37 sampled  $\mathbf{g}$  values or the WT trajectory  $\mathbf{g}^{WT}$ .

38  
39 We compare all these measures using the 200 repeated training carried out for the  
40 controlled oscillation task (Fig. 3d-f). The results are shown in Table S2. There, “Num.”

41 means the number of distinct topologies belongs to the corresponding category; and  
42 “Prob.” means the probability for the RNN model, after being trained and interpreted  
43 by the corresponding method, to give network topology of the corresponding category  
44 (in parallel to Fig. 3e). Some methods seem to be better than others. Especially,  $\Delta_{ij}$   
45 and  $\partial f_j / \partial g_i$  evaluated on random samples seems to be the worst cases. The  
46 interpretation methods used in results of main figures are listed as part of Table S1.

47

#### 48 **(S2) Direct regularization cannot sparsen the regulation network effectively.**

49 Training with weight decay makes the NN weights sparser. But sparsity of the NN  
50 weights does not mean sparsity in the effective regulation network that it represents, as  
51 parameters in RNN do not have explicit correspondence to links in the regulation  
52 network. To justify this, we applied L2 normalization to all the NN weights and bias,  
53 but did not block any of the regulatory links (as we did in Fig. 2c-d). The strength of  
54 L2 normalization term (rate of weight decay) is increased from zero to a very large  
55 value, so large that the network can no longer be trained (Fig. S2a). We found that  
56 network #17, where weight decay is extremely strong, has the same topology as  
57 network #1. Besides, all successful solutions (small training loss, also good in the view  
58 of peak response and adaptation error) have all the links, no matter how strong the L2  
59 term is.

60

61 Another kind of regularization studied here is much more sophisticated. The  $f$  term with  
62 the regulatory link  $i$ -to- $j$  being knocked *out* (i.e.,  $\lambda=0$ ) is computed at each train step,  
63 and a L1 regularization is introduced as follows.

$$64 \quad L1 = \sum_{ij} |\langle \Delta_{ij} \rangle_{WT}| \quad (S3)$$

65 This term, when being added to the training loss, penalizes all “active” gene regulations.  
66 Theoretically, it may help to suppress all unnecessary links and leave only the minimal  
67 network just like LASSO regression. However, with our implementation, this term does  
68 not sparsify the resulting regulation networks very efficiently (Fig. S2b). These  
69 regularization techniques may be further investigated in future works.

70

71 **(S3) The cutoff for defining RNN-discovered topologies in Fig. 3d**

72 In Fig. 3, we use the sign of equation S1 as a representation of the activating / inhibiting  
73 nature of the link  $i$  to  $j$ . The magnitude of  $W$  is kind of reflection of the regulation  
74 strength, on which we may apply a cutoff. We have already presented an argument in  
75 the main text, that too low or too high cutoff value all lead to less topologies emerged.  
76 This situation is shown in Fig. S3c. By varying the cutoff value, the black line stands  
77 for the total number of distinct topologies given by 200 repeated trainings of the RNN  
78 model, and the lighter and darker red lines stand for the overlapping with Hill function  
79 topologies following Fig. 3d. The cutoff value used in the main text is that corresponds  
80 to the *global maxima* of the *black* line. (Vertical dashed line in Fig. S3c).

81

82 Also note that for the case studied here, 200 repeated training sessions (with random  
83 initial weights) seem to have uncovered most of the HF-compatible topologies. Another  
84 200 training sessions hardly lead to any new HF-compatible topologies (Fig. S3d).

85

86 **(S4) Monotonicity and transferability to Hill function models**

87 We perform cross check using the HF models in order to demonstrate the consistency  
88 between the RNN solutions and the “biological realizable” regulations. As for possible  
89 “non-biological” NN solutions, we have mentioned that these solutions may rely on  
90 some highly non-monotonic regulatory links. Therefore, monotonicity of all regulatory  
91 links may be a way for describing “biological relevance” mathematically.

92

93 We define monotonicity in the following way. For a regulation link  $i$ -to- $j$ ,  $\Delta_{ij}$   
94 (equation 2) is evaluated at different time points and under different input stimuli,  
95 resulting in a WT-ensemble of  $\Delta_{ij}$ . We mark different samples in this ensemble by the  
96 upper suffix  $n$ . Being averaged over  $n$ , the mean value gives  $\langle \Delta_{ij} \rangle_{WT}$ . However, this  
97 ensemble of  $\Delta_{ij}^{(n)}$  may not always have uniform signs – the link  $i$ -to- $j$  may appear to  
98 be activating under some circumstances, while inhibiting in some other situations. Non-

99 monotonicity of a link  $ij$  is defined as the sum of the minority:

$$100 \quad \min \left( \sum_n |\Delta_{ij}^{(n)}|_{<0}, \sum_n |\Delta_{ij}^{(n)}|_{>0} \right)$$

101 And the non-monotonicity of an RNN solution is the sum of non-monotonicity of all  
102 its regulation links. The statistics are shown in Fig. S3e. Most RNN solutions that give  
103 rise to HF-relevant networks have low non-monotonicity value (Fig. S3e upper, marked  
104 by the arrow head). And the distribution of non-monotonicity for HF-irrelevant RNN  
105 solutions peaks at a much larger value (Fig. S3e lower). Monotonicity correlates  
106 strongly with HF-relevance.

107

108 Based on these observations, a natural postulation is that penalizing this non-  
109 monotonicity term during training may help to find HF-relevant solutions with high  
110 probability. It is indeed the case, though the improvement does not seem to be very  
111 significant (Table S2, part II. 200 repeated trainings are studied here).

112

### 113 **(S5) Increasing the variance of NN weights at initialization does not help the RNN** 114 **to explore the entire network topology space**

115 We have mentioned in the main text that RNN has bias towards different feasible  
116 underlying mechanisms (Fig. 3f). Gradient descent is inherently a history-dependent  
117 searching algorithm; training may be led to and trapped at just a few local minima.  
118 Initializing the model parameters in a wider range, thus covering the attracting basins  
119 of more local minima, seems to be a straightforward solution to this limitation. However,  
120 this seems not to be applicable to NN. In this paper, initialization of the NN weights  
121 follows identical-independent Gaussian distribution. Changing the variance of weights  
122 at initialization do affects the network topologies found subsequently (Fig. S3f-h). With  
123 increasing initial variance from 0.01 to 0.1 to 1.0, the number of “RNN-relevant”  
124 topologies on the “left branch” also increases from 0 to 5 to 6. However, NN training  
125 is severely affected by too large initial variance (Fig. S3h), resulting in a dramatic  
126 decrease in the probability of finding a HF-relevant topology by RNN.

127

128 **(S6) Modifying training details changes the bias of RNN**

129 In the “default” training settings, the pre-stimulus level of  $g_1$  should be 0.1 (training  
130 case 0 in Fig. 3b), while the pre-stimulus level of  $g_2$  is a free parameter. And the loss  
131 function is simply the square root sum of all three training cases (Fig. 3b). Repeated  
132 training with these settings would give the solutions marked red in Fig. 3d. In a  
133 modified training scenario, the pre-stimulus level of  $g_2$  is set to a fixed value 0.9. For  
134 the initial phase of training (steps 1 to 2000) loss function contains only the term for  
135 oscillation (training case 1 in Fig. 3b), while the full loss function (containing training  
136 cases 0, 1, and 2) is used for training steps after 2000. With these settings, RNN can be  
137 pushed to explore the left-hand-side branch (bright green in Fig. 3f). The green nodes  
138 are the “HF-compatible” topologies (identical or differ by only one more / one less link,  
139 as for the red case) within a total of 200 repeats.

140

141 **(S7) Validation with Enumeration using Logistic regression model**

142 Logistic regression model is a kind of generalized linear model. Mathematically, it is  
143 equivalent to single-layer NN:

144 
$$f_i = \sigma \left( \sum_j W_{ij} g_j + b_i \right); \quad \sigma(x) = \frac{1}{1 + e^{-x}}$$

145 Compared with a multi-layer (or deep) NN, this model is obviously much simpler and  
146 more transparent. As discussed in the main text, we need to verify that network  
147 topologies proposed by deep NN don not rely on any specialized nonlinearity, and can  
148 thus be transferred to other modeling schemes. Apart from the Hill-equation-based  
149 modelling scheme discussed in the main text, we conduct the same validation with  
150 Logistic regression models. Moreover, models with the Logistic-regression-like  
151 structure (linear + saturation) have been introduced by many authors to model the  
152 transcription regulation process <sup>1,2</sup>.

153

154 With the optimal cutoff for regulation strength, 57 different network topologies  
155 emerged in 200 repeated training (same result as Fig. 3d-f); 38 of them (38/57=0.67)  
156 also appears in exhaustive search with the Logistic regression model. (For each network

157 topology, 160,000 sets of  $W$  and  $b$  parameters are randomly sampled.) Again, only the  
158 “right branch” of the network topology space was explored by NN. Though Hill  
159 equation and Logistic regression are very different model frameworks, the cross-  
160 validation results presented here and in Fig. 3d-f are in general consistent.

161

162 **(S8) A repeat of the training-and-deletion sequences of Fig. 4a-b.**

163 Different training-and-deletion sequences could lead to different sparse regulation  
164 modules. Fig. S5a shows a parallel run with the same settings as Fig. 4a-b. Although  
165 solution #1 in both cases have identical topology, differences in the effective regulation  
166 strength lead to different link deletion. These two cases deviate from each other  
167 significantly at step #3 and later. The sparse solution here (#5 in Fig. S5a) has  
168 effectively two nodes:  $g_2$  serves as “external input” to the oscillatory module. While the  
169 case presented in main text (#6 of Fig. 4b) is truly three-node –  $g_2$  functioning as part  
170 of a feedback loop there. As expected, networks #5 in Fig. S5a can also be transferred  
171 successfully to Hill-function models (Fig. S5b). Parameters of this HF model is shown  
172 in Table S5.

173

174 An interpretation of it (#5 in Fig. S5a) could be like this. In the absence of both inputs,  
175 the oscillatory module (feedback loop between  $g_1$  and  $g_3$ ) is suppressed by  $g_2$ . This  
176 repression is released by input  $I_1$ , yielding oscillatory response. On the other hand,  $I_2$  is  
177 able to activate  $g_1$  but unable to remove the repression on the other half of the feedback  
178 loop, leading to sustained high  $g_1$  level.

179

180 **(S9) Hill function model for Fig. 4e and Fig. S5b**

181 The Hill function model used here is slightly more complicated than that used for  
182 enumeration in Fig. 4 (Methods). Here, Hill coefficient is set to  $n=4$ , and a basal  
183 expression term ( $u$ ) is included:

184 
$$f_i = \left( \sum_j h_{ij}^+ \right) \left( \prod_l h_{il}^- \right) + u_i$$

185 Parameters  $K$ ,  $b$ , and  $u$  are sampled from the exponential distribution  $p(x) \propto e^{-0.5*x}$ .

186 The parameter set that gives rise to Fig. 4e and Fig. S5b are given in Table S3 and S\*,  
187 respectively. Numerical integration is carried out using forward Euler method, with a  
188 sufficiently small timestep  $dt=0.01$ .

189

### 190 **(S10) Controlled oscillation with frequency modulation**

191 Training target now consists of five parts: low  $g_1$  in the absent of both stimuli, low/high  
192 frequency oscillation under low/high levels of  $I_1$ , and low/high steady-state response to  
193 low/high levels of  $I_2$ . Low and high input levels are set to be 0.4 and 0.8, respectively.  
194 Again, we use the technique of Fig. 4 to find minimum regulation networks, i.e., by  
195 removing irrelevant links sequentially. Also, for simplicity of the input links,  $I_1$  and  $I_2$   
196 can only act on two different network nodes respectively. For the case that  $I_1$  acts on  $g_2$   
197 and  $I_2$  on  $g_1$ , a meaningful topology found is shown in Fig. S4b insert. The  
198 corresponding RNN behaves like Fig. S4a after training, where oscillation frequency  
199 increases with  $I_1$  level.

200

201 This topology consists of two feedback loops, a small one  $g_1-g_3-g_1$  and a large one  $g_1-$   
202  $g_3-g_2-g_1$ . The way it works can be interpreted as follows. The level of  $g_1$  drops after a  
203 pulse, so as  $g_3$  which relies solely on  $g_1$  for activation. Then  $g_2$  starts to decay without  
204 the activation from  $g_3$ . Only when  $g_2$  falls below certain threshold, can it release its  
205 suppression on  $g_1$  thereby trigger the next pulse. Therefore, the faster  $g_2$  falls the higher  
206 the oscillation frequency. As for input  $I_1$ , its repression helps to cancel out high base-  
207 level expression of  $g_2$ , making it to fall faster when activation from  $g_3$  disappears, hence  
208 modulate the oscillation frequency. In this sense, frequency modulation relies mainly  
209 on the large feedback loop ( $g_1-g_3-g_2-g_1$ ), especially the link  $g_3$ -to- $g_2$ . Without this link,  
210 the large feedback loop is broken, while other modules (small feedback loop and the  
211 double-negative path from  $I_1$  to  $g_1$ ) remains unaffected. This interpretation is supported  
212 by “mutating” this link in the trained network. As expected, though oscillatory response  
213 to  $I_1$  persists, the frequency modulation property is lost (Fig. S4c-d).

214

### 215 **(S11) Training the RNN to simulate CA models in Fig. 6**



216 We first describe the preparation of training data. For each ground truth CA model being  
217 studied, 16 different (random) initial conditions are used to generate 16 different  
218 spatial-temporal trajectories. As the initial condition, all “cells” except the one in the  
219 center have all its  $g$  components equal to 0, and the central cell has randomly sampled  
220 values (between 0 and 1) for all  $g_i$ . Each trajectory has 21 pixels (cells) in the spatial  
221 direction (one-dimensional array, periodic boundary condition), and a total of 320  
222 successive timesteps. The 320 time points are then down sampled by 10-fold, in order  
223 to add difficulty for reverse engineering. Therefore, the training data is an array of size  
224 [trajectories=16, timepoints=32, spatial-points=21, genes=10]. For each gene, its  
225 “expression levels” are then normalized by its maximum value in these 16\*32\*21  
226 different situations.

227

228 The training data is then cut into shorter trajectories, each with 5 (course grained) time  
229 points, corresponding to 41 original time steps. The RNN model is initialized ( $t=0$ )  
230 using the first frame of it, and runs freely to compute 40 successive time points  
231 following equation 1. The model outputs at step  $t=10, 20, 30, 40$  are compared with the  
232 rest 4 temporal frames of training data, giving the loss function.

233

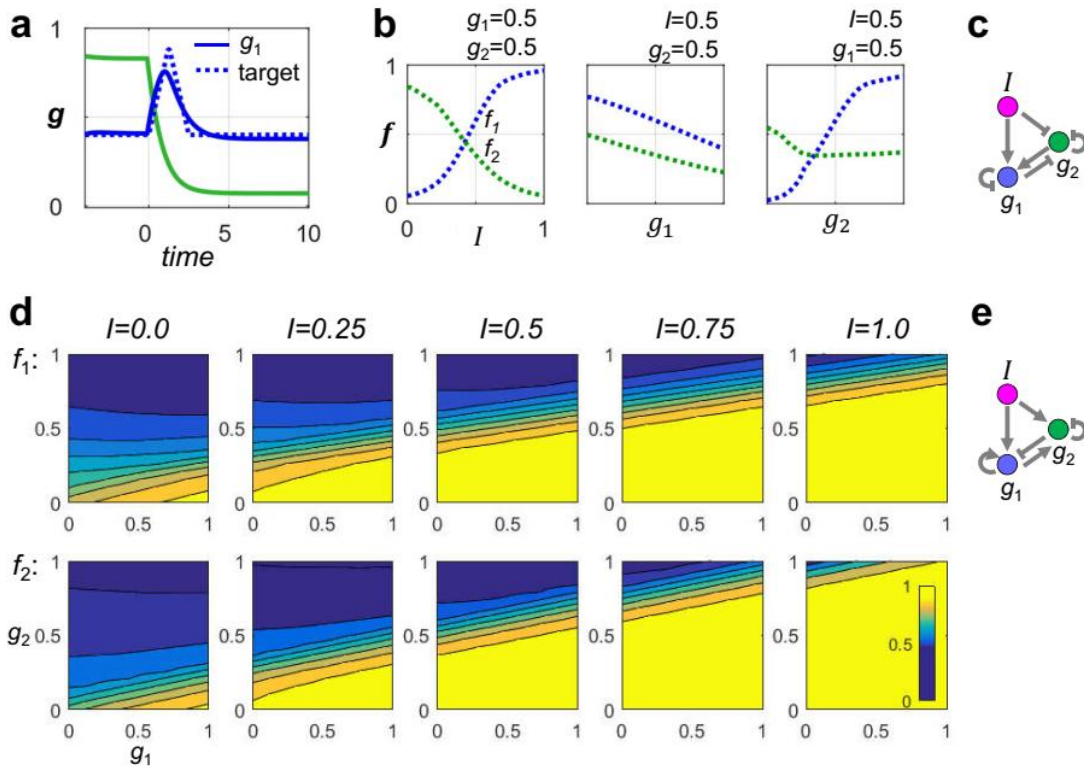

234

235 **Fig. S1.** Training the RNN to perform the adaptation task. (a-c) A triangular pulse  
 236 instead of the smooth double-exponential curve were used as the target response curve.  
 237 Training still converges, and the resulting RNN adopts a regulation network made up  
 238 of the incoherent feed forward loop together with a feedback loop. (d-e) Direct  
 239 visualization of the time iteration function fitted by NN. For the adaptation task, the  
 240 NN computes the functions  $f_1(g_1, g_2, I)$  and  $f_2(g_1, g_2, I)$ . In main text Fig. 1c, several  
 241 cross sections of these multi-variable functions are plotted, reflecting the underlying  
 242 regulations. Here, the entire function is shown, with the horizontal and vertical axis  
 243 showing  $g_1$  and  $g_2$  levels, and different  $I$  level in different columns. Values of the  
 244 synthesis term  $f$  are represented by color. The function is smooth and monotonic. The  
 245 activating and inhibiting regulations indeed hold throughout the entire input range.

246

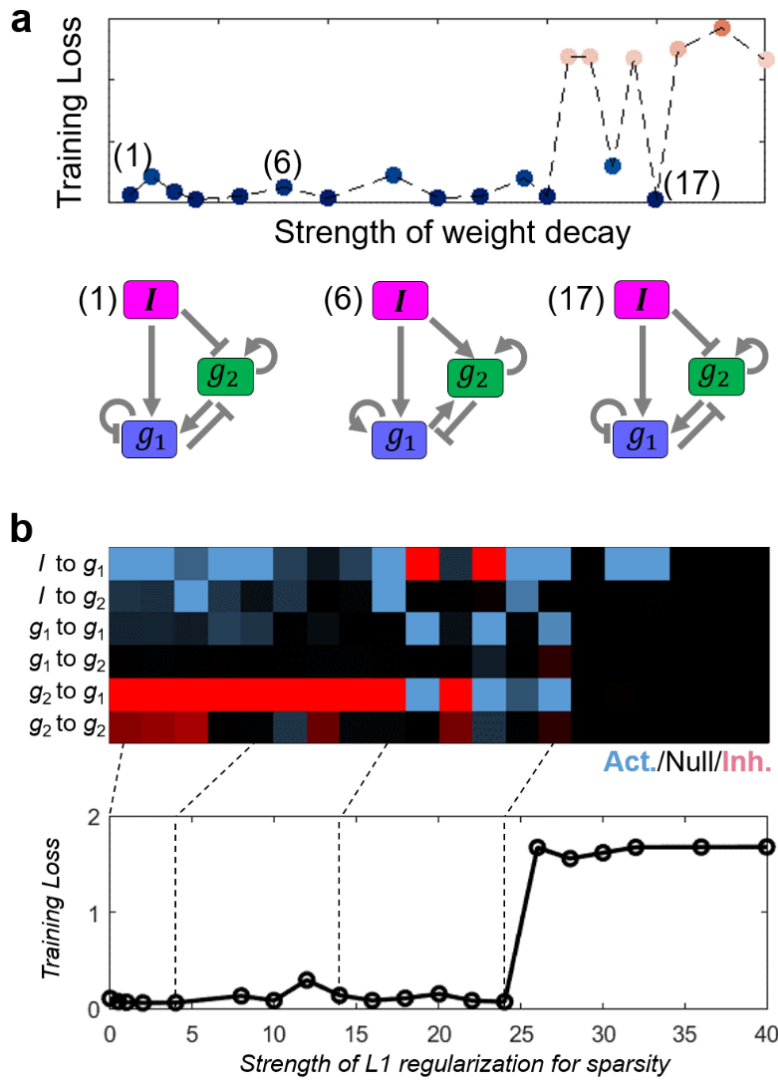

247

248 **Fig. S2.** Trying to find sparse regulation networks with regularization. (a) L2  
 249 regularization on NN weights and bias does not help sparsening the effective regulation  
 250 network. Sparsity is not affected by increasing regularization strength. Successful  
 251 solutions (ones with small training loss) have all six links, no matter how strong the L2  
 252 term is. (b) A different approach is to penalize  $\sum_{ij} |\langle \Delta_{ij} \rangle_{WT}|$ , i.e., the L1 norm  
 253 describing the dependences between genes. However, sparsity seems not to be  
 254 promoted by increasing the regularization strength, either.

255

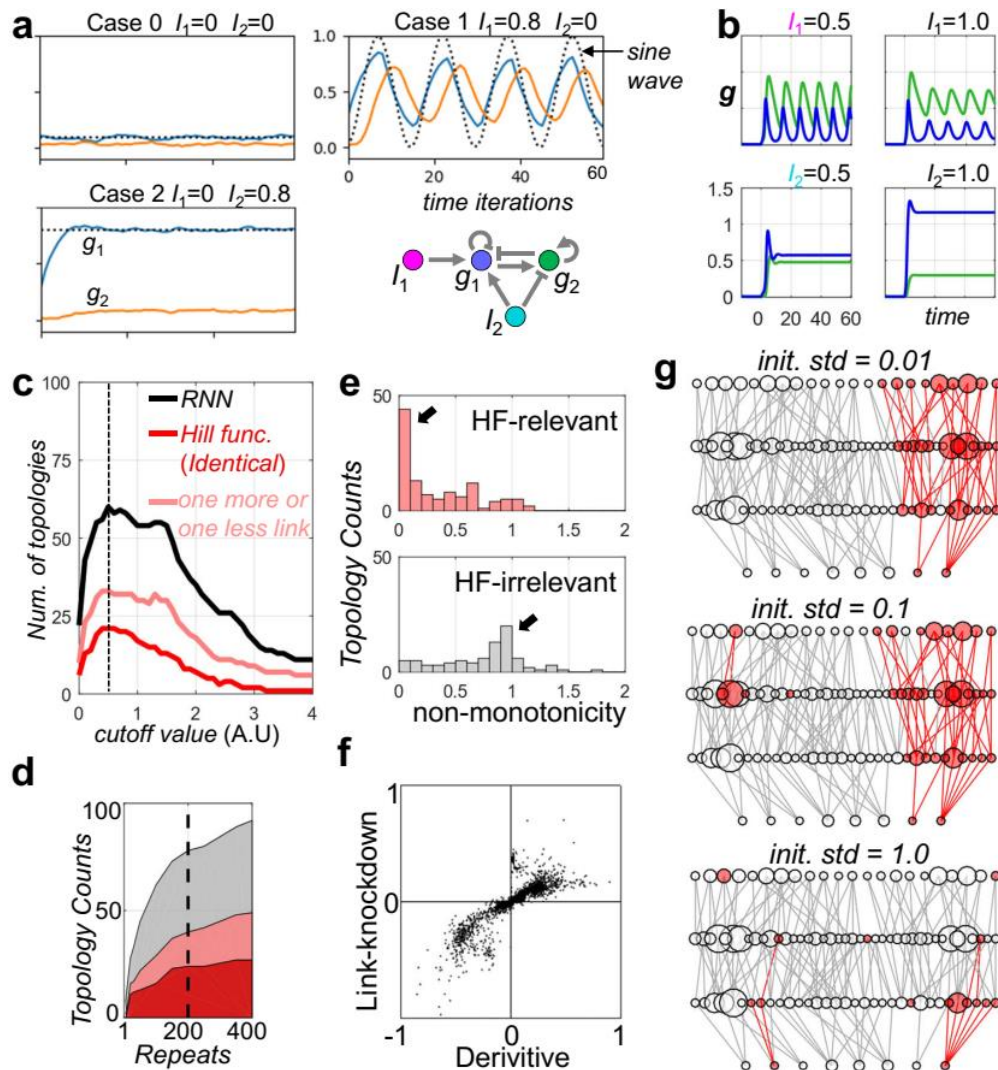

256

257 **Fig. S3.** The case of controlled oscillation. (a) Training of the RNN to perform this task  
 258 does not rely on specific waveforms. Triangular wave is used in Figs. 3-4, and sine  
 259 wave is used here. Both trainings are successful. (b) The network of Fig. 3c can be  
 260 transferred to Hill-function models. Dynamic behavior of the HF model is shown. See  
 261 Table S3 for the parameters. (c) The cutoff for defining topologies found by RNN. See  
 262 Supplemental text S3 for details. (d) 200 repeated training sessions seem to have  
 263 uncovered most of the HF-compatible topologies. (e) For a learnt regulation system,  
 264 HF-relevance correlates with monotonicity. See Supplemental text S4 for details. (f)  
 265 Derivatives  $\partial f_j / \partial g_i$  also correlates positively with the regulations revealed by link  
 266 mutation tests in the qualitative sense. (g) Compare this panel with Fig. 3f. Increasing  
 267 the variance of NN weights at initialization do help the RNN to explore the left branch  
 268 of solution, but training is severely affected by too large initial variance.

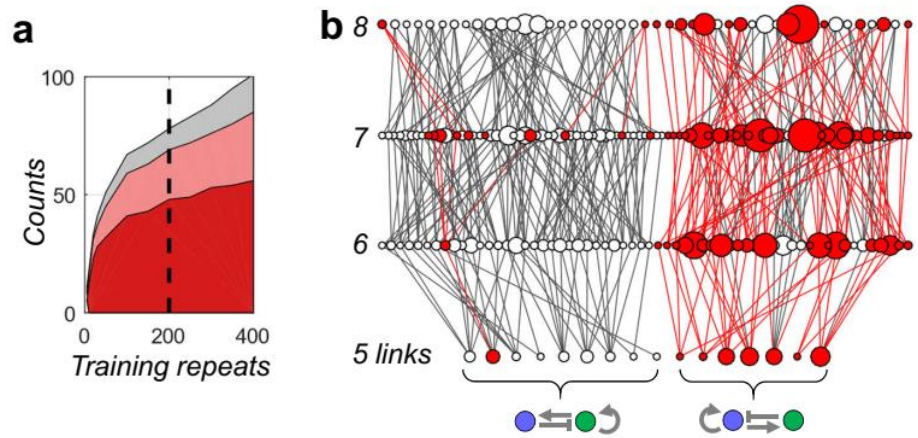

269

270 **Fig. S4.** Most topologies found by RNN can be transferred to Logistic regression model.

271 (a) Statistics of the comparison between RNN with Logistic regression model based  
 272 enumeration. Logistic regression model is equivalent to single-layered neural network.

273 It is understandable that multi-layered NN bears more similarities with single-layered

274 NN, than with Hill function models. (b) Similar to the Hill-equation results, those RNN-

275 compatible topologies (colored red) have some inherent structural bias (not uniformly

276 distributed).

277

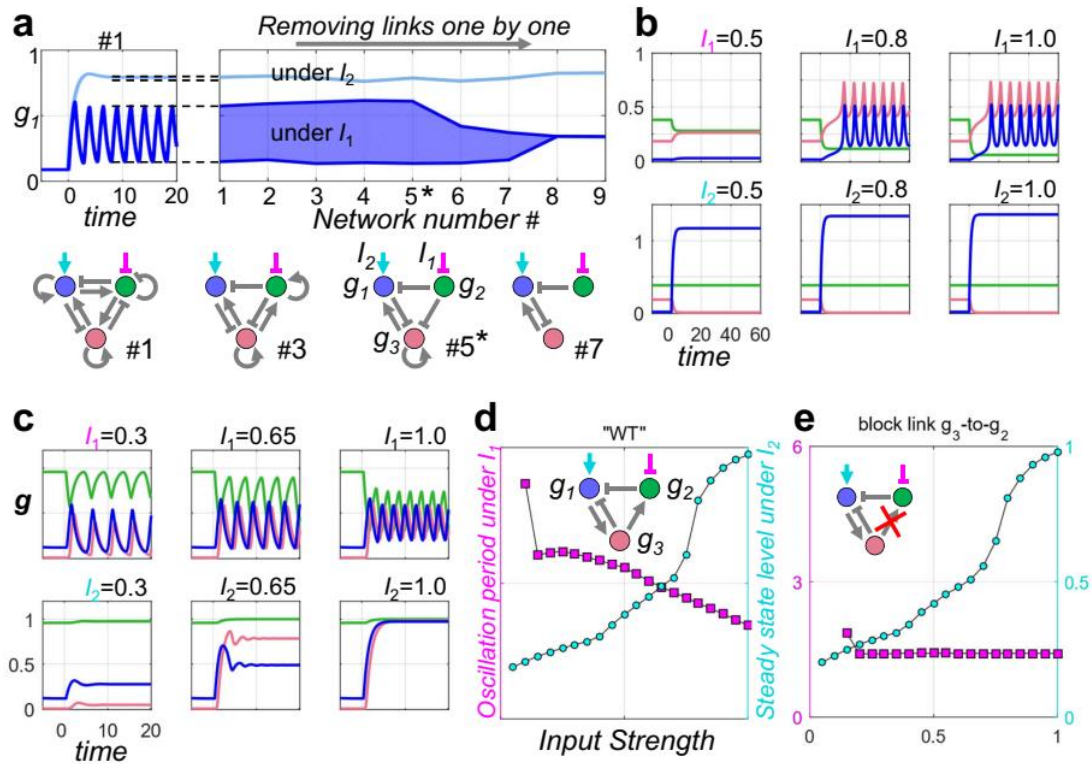

278

279 **Fig. S5.** (a) Another training-and-deletion sequence as Fig. 4a-b. Here, topology #5 is  
 280 sparse and interpretable. It can also be successfully transferred to Hill function model  
 281 (b). See Table S5 for the parameters. (c) Controlled oscillation with frequency  
 282 modulation can also be achieved with the RNN based model. This panel shows the  
 283 dynamics of the trained system. Oscillation frequency can be tuned by level of  $I_1$ , so as  
 284 the steady-state response level by  $I_2$ . (d) The system in panel c shows clear dependence  
 285 of oscillation period on the level of  $I_1$  (magenta squares). Its effective network topology  
 286 is shown as inset. See Supplemental text S3 for an interpretation. (e) Removing  $g_3$ -to-  
 287  $g_2$  activation of the network in panel d destroys frequency modulation. Panels (d) and  
 288 (e) have the same range of axis.

289

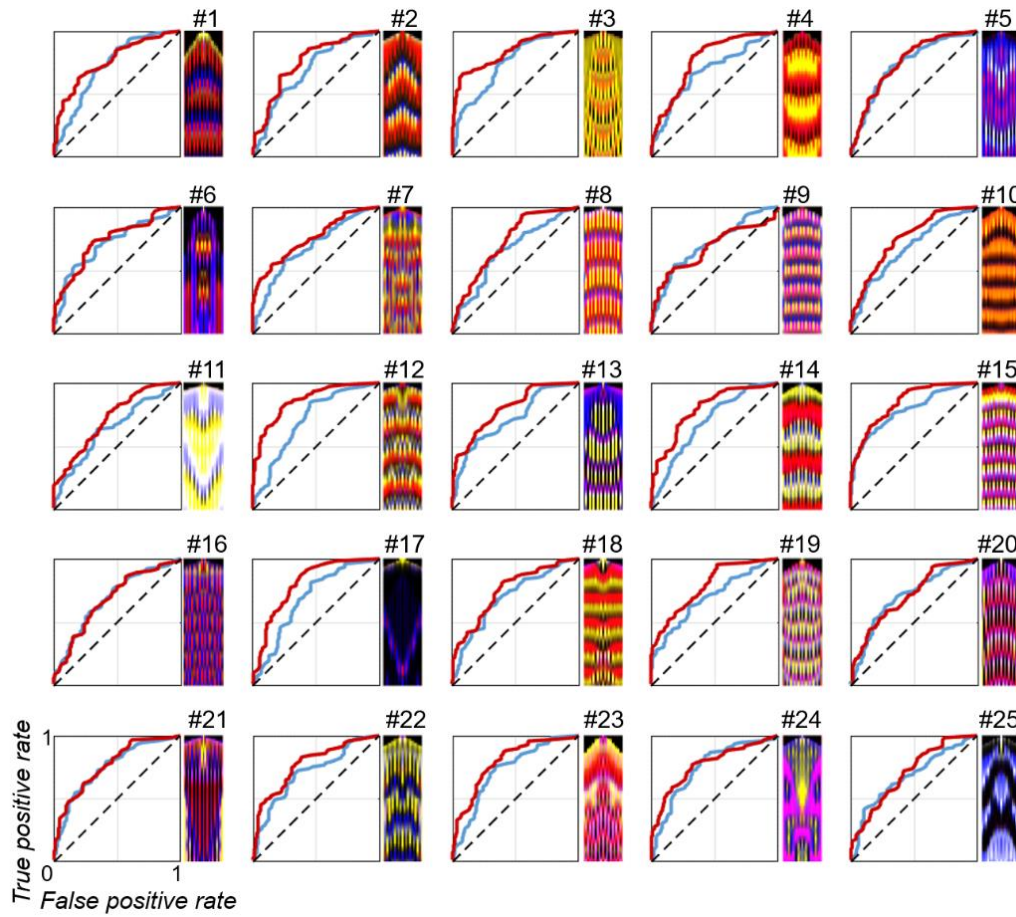

290

291 **Fig. S6.** All 25 CA models studied. Typical spatial-temporal dynamics of the ground-  
 292 truth model is shown on the right. Although there are 10 genes in total ( $g_1$ - $g_{10}$ ), only  
 293  $g_1$ ,  $g_2$  and  $g_3$  are shown in red, yellow and blue here. ROC curves for predicted  
 294 activating /inhibiting links with our RNN-based method (similar to Fig. 6f) are shown  
 295 on the left.

296

**Table S1.** RNN model settings for results in main text.

|                                                 | Fig.1      | Fig.2             | Fig.3                  | Fig.4     | Fig.5                              | Fig.6             |
|-------------------------------------------------|------------|-------------------|------------------------|-----------|------------------------------------|-------------------|
| Part I. RNN model structure                     |            |                   |                        |           |                                    |                   |
| Task                                            | adaptation |                   | Controlled oscillation |           | Gap gene                           | CA                |
| Num. genes                                      | 2          |                   | 2                      | 3         | 4                                  | 10                |
| Num. external inputs                            | 1          |                   | 2                      |           | 2                                  | 0                 |
| Architecture                                    | MLP        | MLPx2             | MLPx2                  | MLPx3     | MLP                                | MLP               |
| Num. nodes in each layer                        | 3,16,16,2  | 3,16,16,1         | 4,16,16,1              | 5,16,16,1 | 6,16,16,4                          | 20,64,64,10       |
| Num. weights and bias                           | 370        | 706               | 738                    | 1155      | 452                                | 6154              |
| RNN iterations                                  | 40         |                   | 60                     |           | 30                                 | 40                |
| Part II. Training data and the training process |            |                   |                        |           |                                    |                   |
| Observable genes                                | $g_1$ only |                   | $g_1$ only             |           | All                                | All               |
| Num. frames per trajectory                      | 40         |                   | 60                     |           | 1                                  | 32                |
| Spatial points                                  | 1          |                   | 1                      |           | 64                                 | 21                |
| Num. trajectories                               | 3          |                   | 3                      |           | 1                                  | 16                |
| Training steps                                  | 2000       |                   | 4000                   |           | 4000                               | 4000              |
| Time required for training                      | 65s        | 81s               | 210s                   | 220s      | 120s                               | 430s              |
| Sampling 1.6E5 parameter sets per topology      | 60s        |                   | 100s                   | 350s      | 120s                               | 240,000s          |
| Total num. of topologies                        | 198        |                   | 2304                   | ~11000    | ~10 <sup>11</sup>                  | ~10 <sup>95</sup> |
| Part III. Interpretation of the trained NN      |            |                   |                        |           |                                    |                   |
| Method                                          | plot       | Mutant trajectory |                        |           | $\langle \Delta_{ij} \rangle_{WT}$ |                   |
| $\lambda$ value                                 | /          | 0                 | 0.9                    | 0.9       | 0                                  |                   |



**Table S2.** Comparison of different implementations of link-mutation method.

|                                                          | All topologies | HF-relevant |       | Direct hit |       |
|----------------------------------------------------------|----------------|-------------|-------|------------|-------|
|                                                          | Num.           | Num.        | Prob. | Num.       | Prob. |
| Part I. For the 200 repeated trainings in Fig. 3d-f      |                |             |       |            |       |
| Mutant trajectory $\lambda = 0$                          | 66             | 31          | 52.9% | 15         | 28.0% |
| Mutant trajectory $\lambda = 0.5$                        | 64             | 33          |       | 17         |       |
| Mutant trajectory $\lambda = 0.9^*$                      | 64             | 36          | 54.9% | 21         | 38.3% |
| Mutant trajectory $\lambda = 0.95$                       | 68             | 36          |       | 22         |       |
| Mutant trajectory $\lambda = 0.99$                       | 65             | 40          | 58.0% | 23         | 36.9% |
| WT trajectory $\lambda = 0$                              | 52             | 25          | 52.6% | 13         | 26.3% |
| WT trajectory $\lambda = 0.9$                            | 64             | 39          | 68.1% | 16         | 30.9% |
| WT trajectory $\lambda = 0.99$                           | 61             | 40          | 66.7% | 17         | 30.2% |
| Random samples $\lambda = 0$                             | 52             | 27          | 57.0% | 9          | 10.9% |
| Random samples $\lambda = 0.9$                           | 55             | 33          | 68.2% | 15         | 22.6% |
| Random samples $\lambda = 0.99$                          | 64             | 40          | 67.7% | 15         | 16.9% |
| WT trajectory $\partial f_j / \partial g_i$              | 63             | 34          | 63.9% | 16         | 27.8% |
| Random samples $\partial f_j / \partial g_i$             | 55             | 30          | 46.4% | 12         | 13.9% |
| Part II. Training with L1 regularization on monotonicity |                |             |       |            |       |
| Mutant trajectory $\lambda = 0$                          | 50             | 32          | 70.3% | 18         | 42.2% |
| Mutant trajectory $\lambda = 0.9$                        | 52             | 30          | 65.9% | 14         | 40.5% |
| Mutant trajectory $\lambda = 0.99$                       | 51             | 26          | 57.3% | 14         | 37.1% |

303

304

305

306

307 **Table S3.** Parameters for Hill function model with the topology of Fig. 3c. (Hill  
 308 coefficient  $n=2$ )

| link           | Activation/Inhibition | b     | K     |
|----------------|-----------------------|-------|-------|
| $I_1$ to $g_1$ | Act.                  | 0.174 | 0.523 |
| $I_2$ to $g_1$ | Act.                  | 0.782 | 1.857 |
| $g_1$ to $g_1$ | Act.                  | 1.689 | 0.339 |
| $g_2$ to $g_1$ | Inh.                  | /     | 0.420 |
| $I_1$ to $g_2$ | Act.                  | 0.143 | 0.491 |
| $I_2$ to $g_2$ | Inh.                  | /     | 0.597 |
| $g_1$ to $g_2$ | Act.                  | 1.403 | 0.753 |
| $g_2$ to $g_2$ | Act.                  | 1.328 | 0.891 |

309

310

**Table S4.** Parameters for Hill function model in Fig. 4e. (Hill coefficient  $n=4$ )

| link           | Activation/Inhibition | b     | K     |
|----------------|-----------------------|-------|-------|
| $I_1$ to $g_1$ | /                     | /     | /     |
| $I_2$ to $g_1$ | Act.                  | 0.983 | 0.397 |
| $g_1$ to $g_1$ | /                     | /     | /     |
| $g_2$ to $g_1$ | Act.                  | 1.259 | 0.730 |
| $g_3$ to $g_1$ | Inh.                  | /     | 4.503 |
| $I_1$ to $g_2$ | Act.                  | 6.424 | 0.416 |
| $I_2$ to $g_2$ | /                     | /     | /     |
| $g_1$ to $g_2$ | /                     | /     | /     |
| $g_2$ to $g_2$ | /                     | /     | /     |
| $g_3$ to $g_2$ | Inh.                  | /     | 0.043 |
| $I_1$ to $g_3$ | /                     | /     | /     |
| $I_2$ to $g_3$ | /                     | /     | /     |
| $g_1$ to $g_3$ | Act.                  | 2.189 | 0.905 |
| $g_2$ to $g_3$ | /                     | /     | /     |
| $g_3$ to $g_3$ | /                     | /     | /     |
|                | Basal expression $u$  |       |       |
| $g_1$          | 0.076                 |       |       |
| $g_2$          | 0.871                 |       |       |
| $g_3$          | 0.050                 |       |       |

**Table S5.** Parameters for Hill function model in Fig. S5b. (Hill coefficient  $n=4$ )

| link           | Activation/Inhibition | b     | K     |
|----------------|-----------------------|-------|-------|
| $I_1$ to $g_1$ | /                     | /     | /     |
| $I_2$ to $g_1$ | Act.                  | 1.370 | 0.324 |
| $g_1$ to $g_1$ | /                     | /     | /     |
| $g_2$ to $g_1$ | Inh.                  | /     | 4.514 |
| $g_3$ to $g_1$ | Act.                  | 2.960 | 0.381 |
| $I_1$ to $g_2$ | Inh.                  | /     | 0.643 |
| $I_2$ to $g_2$ | /                     | /     | /     |
| $g_1$ to $g_2$ | /                     | /     | /     |
| $g_2$ to $g_2$ | /                     | /     | /     |
| $g_3$ to $g_2$ | /                     | /     | /     |
| $I_1$ to $g_3$ | /                     | /     | /     |
| $I_2$ to $g_3$ | /                     | /     | /     |
| $g_1$ to $g_3$ | Inh.                  | /     | 0.446 |
| $g_2$ to $g_3$ | Inh.                  | /     | 0.440 |
| $g_3$ to $g_3$ | Act.                  | 1.307 | 0.350 |
|                | Basal expression $u$  |       |       |
| $g_1$          | 0.0085                |       |       |
| $g_2$          | 0.382                 |       |       |
| $g_3$          | 0.112                 |       |       |

317 **References:**

- 318 1. Jaeger, J., *et al.* Dynamic control of positional information in the early *Drosophila* embryo.  
319 *Nature* **430**, 368-371 (2004).
- 320 2. Cotterell, J. & Sharpe, J. An atlas of gene regulatory networks reveals multiple three-gene  
321 mechanisms for interpreting morphogen gradients. *Mol. Syst. Biol.* **6**, 425 (2010).

322
